# Supplementary material for: Differentiating intramolecular spodium bonds from coordination bonds in two polynuclear zinc(ii) Schiff base complexes
Source: Royal Society of Chemistry journal article supplement (doi:10.1039/d1ce00214g), 2021-01-01
Supplement: d1ce00214g1.pdf [file d1ce00214g1.pdf]

Supplementary Information

Differentiating intramolecular spodium bonds from coordination bonds in two polynuclear zinc(II) Schiff base complexes

Tanmoy Basak, Rosa M. Gomila, Antonio Frontera and Shouvik Chattopadhyay

---

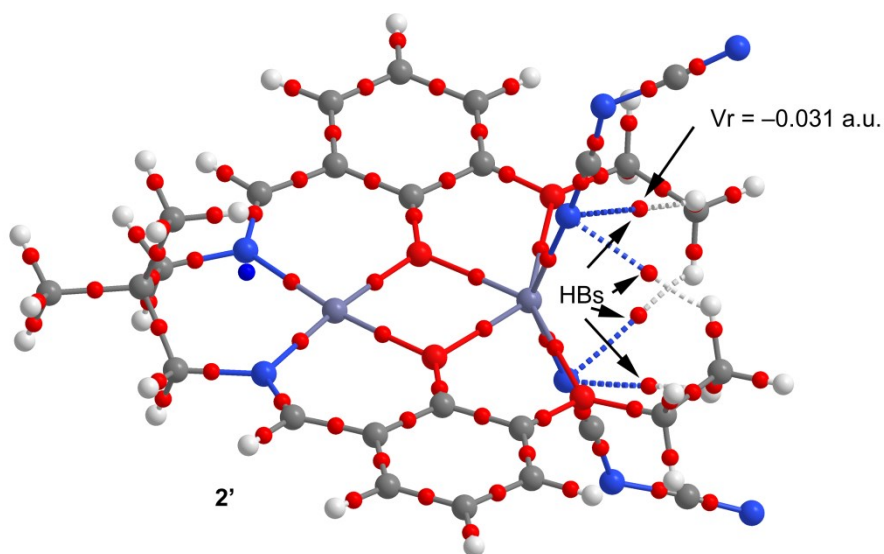

Figure S1. Hydrogen bonds interaction in **2'**

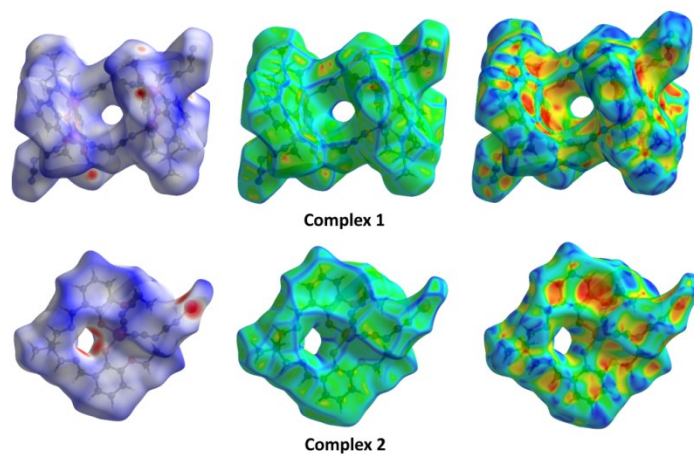

**Figure S2.** Hirshfeld surfaces mapped over  $d_{\text{norm}}$  (left), curvedness (middle) and shape index (right) for complexes **1**(top) and **2**(bottom).

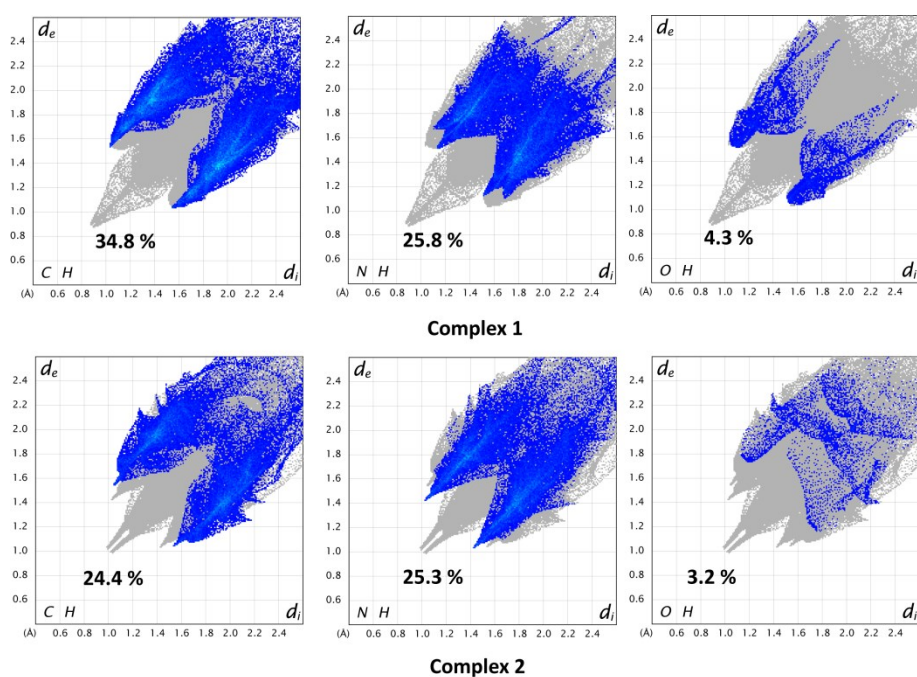

**Figure S3.** Fingerprint plot: Resolved into C...H/H...C, N...H/H...N and O...H/H...O contacts contributed to the total Hirshfeld Surface area of complexes **1** and **2**.

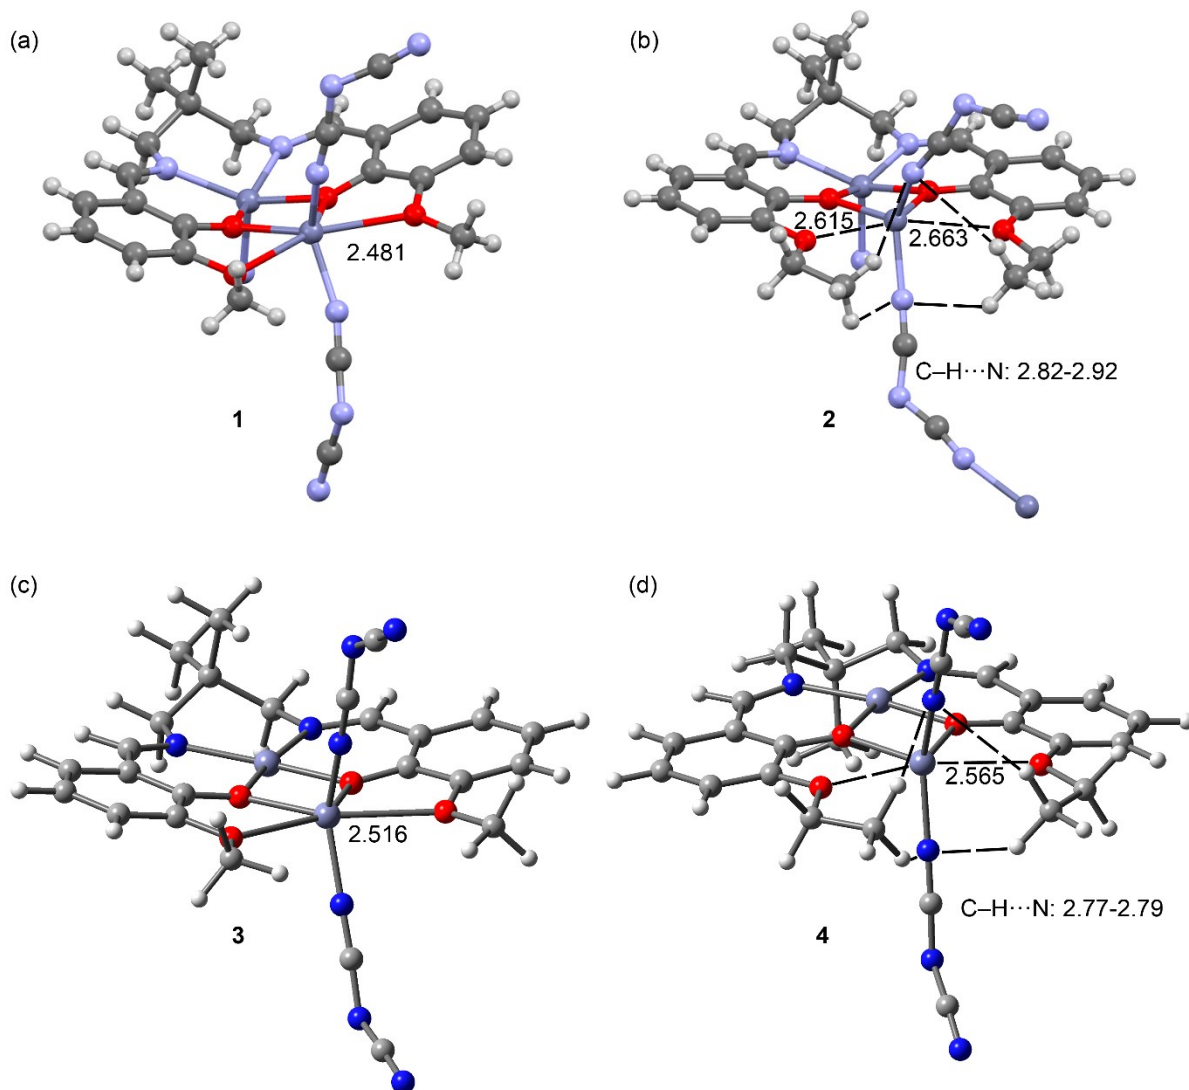

**Figure S4:** Experimental and theoretical geometries of 1 (a,c) and 2 (b,d). Distances in Å.

**Table S1.** Selected bond angles (°) of complexes 1 and 2.

| Complex         | 1        | 2        |
|-----------------|----------|----------|
| O(1)–Zn(1)–O(2) | 75.5(2)  | 76.1(3)  |
| O(1)–Zn(1)–N(5) | 105.9(3) | 102.0(3) |
| O(1)–Zn(1)–N(1) | 88.8(2)  | 88.4(3)  |
| O(1)–Zn(1)–N(2) | 154.6(3) | 152.9(2) |
| O(2)–Zn(1)–N(1) | 146.6(3) | 152.8(3) |
| O(2)–Zn(1)–N(2) | 87.6(2)  | 88.6(2)  |
| O(2)–Zn(1)–N(5) | 109.6(3) | 105.5(3) |

|                 |          |          |
|-----------------|----------|----------|
| N(1)–Zn(1)–N(5) | 102.9(3) | 99.7(3)  |
| N(1)–Zn(1)–N(2) | 95.5(2)  | 95.9(2)  |
| N(2)–Zn(1)–N(5) | 97.5(3)  | 103.6(3) |
| O(1)–Zn(2)–O(2) | 76.8(3)  | 78.1(3)  |
| O(1)–Zn(2)–O(3) | 67.8(2)  | 68.2(2)  |
| O(1)–Zn(2)–O(4) | 146.7(2) | 145.9(2) |
| O(1)–Zn(2)–N(3) | 107.9(3) | 110.6(3) |
| O(1)–Zn(2)–N(4) | 112.1(3) | 109.7(3) |
| O(2)–Zn(2)–O(3) | 144.6(2) | 146.1(2) |
| O(2)–Zn(2)–O(4) | 69.8(2)  | 67.9(2)  |
| O(2)–Zn(2)–N(3) | 110.0(3) | 115.5(3) |
| O(2)–Zn(2)–N(4) | 114.1(3) | 109.9(3) |
| O(3)–Zn(2)–O(4) | 145.3(2) | 145.8(2) |
| O(3)–Zn(2)–N(3) | 84.4(3)  | 80.8(3)  |
| O(3)–Zn(2)–N(4) | 77.9(2)  | 79.7(3)  |
| O(4)–Zn(2)–N(3) | 84.2(3)  | 85.2(3)  |
| O(4)–Zn(2)–N(4) | 82.3(3)  | 82.6(3)  |
| N(3)–Zn(2)–N(4) | 125.3(3) | 123.8(3) |

**Table S2. Electron charge density ( $\rho$ ), its Laplacian ( $\nabla^2\rho$ ), kinetic ( $V$ ), Lagrangian ( $G$ ) and total ( $H$ ) energy densities at the bond CPs labelled in Figure 4 for complexes 1 and 2 in a.u.**

| CP               | $\rho(r)$ | $\nabla^2\rho(r)$ | $V(r)$  | $G(r)$ | $H(r)$  |
|------------------|-----------|-------------------|---------|--------|---------|
| <b>Complex 1</b> |           |                   |         |        |         |
| <b>a</b>         | 0.0785    | 0.3378            | −0.1147 | 0.0996 | −0.0151 |
| <b>b</b>         | 0.0756    | 0.3168            | −0.1070 | 0.0931 | −0.0139 |
| <b>c</b>         | 0.0683    | 0.3550            | −0.1062 | 0.0975 | −0.0087 |

|                  |        |        |         |        |         |
|------------------|--------|--------|---------|--------|---------|
| <b>d</b>         | 0.0676 | 0.3498 | -0.1045 | 0.0960 | -0.0085 |
| <b>e</b>         | 0.0734 | 0.3939 | -0.1194 | 0.1089 | -0.0105 |
| <b>f</b>         | 0.0710 | 0.3818 | -0.1140 | 0.1047 | -0.0093 |
| <b>g</b>         | 0.0920 | 0.4452 | -0.1537 | 0.1325 | -0.0212 |
| <b>h</b>         | 0.0905 | 0.4409 | -0.1504 | 0.1303 | -0.0201 |
| <b>i</b>         | 0.0244 | 0.0962 | -0.0241 | 0.0241 | 0.0000  |
| <b>j</b>         | 0.0213 | 0.0794 | -0.0199 | 0.0199 | 0.0000  |
| <b>Complex 2</b> |        |        |         |        |         |
| <b>a</b>         | 0.0822 | 0.3586 | -0.1232 | 0.1064 | -0.0168 |
| <b>b</b>         | 0.0760 | 0.3216 | -0.1084 | 0.0944 | -0.0140 |
| <b>c</b>         | 0.0681 | 0.3500 | -0.1052 | 0.0964 | -0.0088 |
| <b>d</b>         | 0.0696 | 0.3613 | -0.1090 | 0.0997 | -0.0093 |
| <b>e</b>         | 0.0760 | 0.4162 | -0.1264 | 0.1152 | -0.0112 |
| <b>f</b>         | 0.0738 | 0.4010 | -0.1210 | 0.1106 | -0.0104 |
| <b>g</b>         | 0.0910 | 0.4350 | -0.1498 | 0.1293 | -0.0205 |
| <b>h</b>         | 0.0894 | 0.4340 | -0.1481 | 0.1283 | -0.0208 |
| <b>i</b>         | 0.0170 | 0.0595 | -0.0149 | 0.0149 | 0.0000  |
| <b>j</b>         | 0.0185 | 0.0667 | -0.0167 | 0.0167 | 0.0000  |

### IR and UV-Vis Spectra and magnetic moment

The characteristic imines (C=N) stretching vibration of the synthesized complexes were located within the range 1580-1621  $\text{cm}^{-1}$ .<sup>1</sup> Dicyanamide complexes displayed strong bands at  $\sim 2327 \text{ cm}^{-1}$  and  $2298 \text{ cm}^{-1}$  in complex **1**;  $2346 \text{ cm}^{-1}$  and  $2266 \text{ cm}^{-1}$  in complex **2**.<sup>2</sup> Such spectral values are due to the bridging mode of  $\nu(\text{dca})$ . The IR spectra were extensively compared with previously reported Zn (II)-complexes concerning the bridging mode of dicyanamide co-ligands.<sup>3-5</sup> The electronic spectra of both complexes show bands at  $\sim 270$  and  $\sim 370 \text{ nm}$ , which may be assigned as  $\pi \rightarrow \pi^*$  and  $n \rightarrow \pi^*$  transitions, respectively.<sup>6</sup> The absence

of any d-d transition is in accordance with the presence of  $d^{10}$  configuration of zinc(II).<sup>7</sup> Room temperature magnetic susceptibility measurements show that both complexes are diamagnetic, as anticipated for zinc(II) complexes.

### Hirshfeld analysis

Hirshfeld surface study<sup>8-10</sup> leads us to understand the different intermolecular interactions that were carried out for both complexes **1** and **2** with the help of Crystal Explorer software.<sup>11</sup> Two-dimensional fingerprint plots<sup>12-14</sup> were obtained and two types of distances ( $d_e$  and  $d_i$ ) are obtained for each point on the Hirshfeldisurface.  $d_e$  is defined as the distance between the surface and the nearest nucleus external to the surface whereas  $d_i$  is just the opposite of  $d_e$  i.e. the distance between the surface and the nearest nucleus internal to the surface. Another three dimensional term ( $d_{norm}$ ) is also important as far as Hirshfeld surface analysis is concerned. It is nothing but a normalized contact distance.  $d_e$  and  $d_i$  are normalised by the van der Waals radius of the atom ( $r_i^{vdw}$  and  $r_e^{vdw}$ ) and the summation of these two quantities result in normalized contact distance ( $d_{norm}$ ) according to the following equation:

$$d_{norm} = \frac{(d_i - r_i^{vdw})}{r_i^{vdw}} + \frac{(d_e - r_e^{vdw})}{r_e^{vdw}}$$

Three types of Hirshfeld surfaces of the complex were achieved on mapping over  $d_{norm}$ , curvedness and shape index (Figure **S1**). Curvedness is actually a function of the root mean square of the curvature of the surface and thus defining the shape of the crystal. On the other hand shape index is a qualitative measurement of the shape and very sensitive to a slight change in the shape of the surface, particularly in a region where the curvedness is

very low. Figure **S2** clearly depicts three types of regions i.e. red, blue and white which are defined by  $d_{\text{norm}}$  values.

On analyzing the 2D Fingerprint plots (Figure **S2**), it is found that the proportion of the Hirshfeld surface for C $\cdots$ H interaction in **1** (34.8%) is considerably higher than that in **2** (24.4%). The Hirshfeld surface proportion of H $\cdots$ N/N $\cdots$ H interaction is, on the other hand, is comparable (25.8% for complex**1** and 25.3% for complex**2**). The O $\cdots$ H/H $\cdots$ O interaction is around 4.3% for complex**1** which is also slightly greater than that for complex **2** (3.2%).

### CartesianCoordinates

#### Zn (dca)<sub>2</sub>

|    |            |            |           |
|----|------------|------------|-----------|
| Zn | -0.5213713 | 0.0483826  | 0.0000000 |
| N  | -0.8609402 | -4.1259880 | 0.0000000 |
| C  | -0.0333586 | -5.1433856 | 0.0000000 |
| C  | -0.7085018 | -2.9068655 | 0.0000000 |
| N  | 0.6354453  | -6.0861879 | 0.0000000 |
| N  | -0.7033123 | -1.7225076 | 0.0000000 |
| N  | -0.0506760 | 4.2098461  | 0.0000000 |
| C  | 0.9491408  | 5.0580363  | 0.0000000 |
| C  | -0.1319338 | 2.9842630  | 0.0000000 |
| N  | 1.7778470  | 5.8639858  | 0.0000000 |
| N  | -0.3523392 | 1.8204209  | 0.0000000 |

**1'**

|    |            |            |            |
|----|------------|------------|------------|
| Zn | 2.0031065  | 0.2902218  | 0.0000000  |
| O  | 0.3031543  | 0.4477893  | 1.2707529  |
| O  | 2.6036876  | 0.2440500  | 2.4437055  |
| C  | -2.1987519 | 0.2680719  | 2.7564249  |
| H  | -3.0087677 | 0.1818666  | 3.4886895  |
| N  | -2.5435269 | 0.4736885  | 1.5294002  |
| N  | -2.5435269 | 0.4736885  | -1.5294002 |
| C  | 0.2922268  | 0.2440693  | 2.5612951  |
| C  | 0.3825812  | -0.2209708 | 5.3395333  |
| H  | 0.4331156  | -0.4024873 | 6.4052770  |
| C  | -0.8233930 | -0.0921347 | 4.7103439  |
| H  | -1.7477032 | -0.1672325 | 5.2726161  |
| C  | 1.5304595  | 0.1162226  | 3.2429324  |
| C  | -0.8932088 | 0.1409646  | 3.3175661  |
| C  | -0.8233930 | -0.0921347 | -4.7103439 |
| H  | -1.7477032 | -0.1672325 | -5.2726161 |
| C  | 1.5304595  | 0.1162226  | -3.2429324 |
| C  | 1.5678598  | -0.1167989 | -4.5991921 |
| H  | 2.5209551  | -0.2206817 | -5.1014510 |
| O  | 2.6036876  | 0.2440500  | -2.4437055 |
| O  | 0.3031543  | 0.4477893  | -1.2707529 |
| C  | 1.5678598  | -0.1167989 | 4.5991921  |
| H  | 2.5209551  | -0.2206817 | 5.1014510  |
| C  | -0.8932088 | 0.1409646  | -3.3175661 |
| C  | -2.1987519 | 0.2680719  | -2.7564249 |



|    |            |            |            |
|----|------------|------------|------------|
| H  | -3.0087677 | 0.1818666  | -3.4886895 |
| C  | 3.8968731  | 0.0798362  | 2.9879420  |
| H  | 4.0219625  | -0.9261125 | 3.3991777  |
| H  | 4.0939157  | 0.8294598  | 3.7595944  |
| C  | -3.9663479 | 0.6197074  | 1.2648246  |
| H  | -4.1919855 | 1.6893387  | 1.1728124  |
| H  | -4.5360114 | 0.2453435  | 2.1243334  |
| C  | 0.2922268  | 0.2440693  | -2.5612951 |
| C  | 0.3825812  | -0.2209708 | -5.3395333 |
| H  | 0.4331156  | -0.4024873 | -6.4052770 |
| C  | 3.8968731  | 0.0798362  | -2.9879420 |
| H  | 4.0939157  | 0.8294598  | -3.7595944 |
| H  | 4.0219625  | -0.9261125 | -3.3991777 |
| C  | -3.9663479 | 0.6197074  | -1.2648246 |
| H  | -4.5360114 | 0.2453435  | -2.1243334 |
| H  | -4.1919855 | 1.6893387  | -1.1728124 |
| C  | -4.4677587 | -0.0868570 | 0.0000000  |
| C  | -5.9902454 | 0.0444635  | 0.0000000  |
| H  | -6.4210909 | -0.4347661 | 0.8818230  |
| H  | -6.3018815 | 1.0929709  | 0.0000000  |
| H  | -6.4210909 | -0.4347661 | -0.8818230 |
| C  | -4.0787626 | -1.5595162 | 0.0000000  |
| H  | -4.4779020 | -2.0628195 | 0.8838499  |
| H  | -4.4779020 | -2.0628195 | -0.8838499 |
| H  | -2.9964467 | -1.7066426 | 0.0000000  |
| Zn | -1.2205883 | 0.5040019  | 0.0000000  |

|   |           |            |            |
|---|-----------|------------|------------|
| N | 2.8354215 | -3.9696157 | 0.0000000  |
| C | 3.9730602 | -4.6251447 | 0.0000000  |
| C | 2.7039866 | -2.7166384 | 0.0000000  |
| N | 4.9282664 | -5.2822858 | 0.0000000  |
| N | 2.4567264 | -1.5713970 | 0.0000000  |
| N | 4.2823727 | 3.9772474  | 0.0000000  |
| C | 5.5849135 | 4.1431922  | 0.0000000  |
| C | 3.6854537 | 2.8678198  | 0.0000000  |
| N | 6.7206589 | 4.3768201  | 0.0000000  |
| N | 3.0276321 | 1.8987308  | 0.0000000  |
| H | 4.5889405 | 0.2249098  | 2.1617637  |
| H | 4.5889405 | 0.2249098  | -2.1617637 |

**1'a**

|    |            |           |            |
|----|------------|-----------|------------|
| Zn | 2.2154523  | 0.1743833 | 0.0000000  |
| O  | 0.6210695  | 0.3939183 | 1.2725497  |
| C  | -1.8772422 | 0.3383749 | 2.7714962  |
| H  | -2.6873755 | 0.2853763 | 3.5066372  |
| N  | -2.2218346 | 0.4725535 | 1.5352310  |
| N  | -2.2218346 | 0.4725535 | -1.5352310 |
| C  | 0.6294042  | 0.2933367 | 2.5867140  |
| C  | 0.6945300  | 0.0588546 | 5.4066238  |
| C  | -0.5078991 | 0.1366093 | 4.7388859  |
| H  | -1.4245153 | 0.1064407 | 5.3179929  |

|   |            |            |            |
|---|------------|------------|------------|
| C | 1.8366969  | 0.2159409  | 3.2833067  |
| C | -0.5685150 | 0.2561375  | 3.3399125  |
| C | -0.5078991 | 0.1366093  | -4.7388859 |
| H | -1.4245153 | 0.1064407  | -5.3179929 |
| C | 1.8366969  | 0.2159409  | -3.2833067 |
| C | 1.8761570  | 0.1015110  | -4.6574488 |
| H | 2.8408875  | 0.0451340  | -5.1446599 |
| O | 0.6210695  | 0.3939183  | -1.2725497 |
| C | 1.8761570  | 0.1015110  | 4.6574488  |
| H | 2.8408875  | 0.0451340  | 5.1446599  |
| C | -0.5685150 | 0.2561375  | -3.3399125 |
| C | -1.8772422 | 0.3383749  | -2.7714962 |
| H | -2.6873755 | 0.2853763  | -3.5066372 |
| C | -3.6476722 | 0.5868952  | 1.2648703  |
| H | -3.8959932 | 1.6512616  | 1.1698463  |
| H | -4.2114264 | 0.2020154  | 2.1232995  |
| C | 0.6294042  | 0.2933367  | -2.5867140 |
| C | 0.6945300  | 0.0588546  | -5.4066238 |
| C | -3.6476722 | 0.5868952  | -1.2648703 |
| H | -4.2114264 | 0.2020154  | -2.1232995 |
| H | -3.8959932 | 1.6512616  | -1.1698463 |
| C | -4.1299071 | -0.1324983 | 0.0000000  |
| C | -5.6553903 | -0.0383315 | 0.0000000  |
| H | -6.0742635 | -0.5279539 | 0.8818216  |
| H | -5.9927409 | 1.0022413  | 0.0000000  |
| H | -6.0742635 | -0.5279539 | -0.8818216 |

|    |            |            |            |
|----|------------|------------|------------|
| C  | -3.7071269 | -1.5959801 | 0.0000000  |
| H  | -4.0945922 | -2.1080885 | 0.8839246  |
| H  | -4.0945922 | -2.1080885 | -0.8839246 |
| H  | -2.6219089 | -1.7211729 | 0.0000000  |
| Zn | -0.9031864 | 0.4744436  | 0.0000000  |
| N  | 3.0737346  | -4.0457561 | 0.0000000  |
| C  | 4.1801956  | -4.7524288 | 0.0000000  |
| C  | 2.9694254  | -2.7951606 | 0.0000000  |
| N  | 5.1000939  | -5.4570177 | 0.0000000  |
| N  | 2.7407261  | -1.6440836 | 0.0000000  |
| N  | 4.5447203  | 3.7968689  | 0.0000000  |
| C  | 5.8360936  | 4.0337692  | 0.0000000  |
| C  | 3.9754975  | 2.6793899  | 0.0000000  |
| N  | 6.9542299  | 4.3380403  | 0.0000000  |
| N  | 3.3281891  | 1.7001162  | 0.0000000  |
| H  | 2.7641113  | 0.2519516  | -2.7224357 |
| H  | 2.7641113  | 0.2519516  | 2.7224357  |
| O  | 0.6408811  | -0.0511177 | -6.7536004 |
| O  | 0.6408811  | -0.0511177 | 6.7536004  |
| C  | 1.8578569  | -0.1573413 | 7.4570476  |
| H  | 1.5919066  | -0.2463462 | 8.5085235  |
| H  | 2.4218005  | -1.0461991 | 7.1536208  |
| H  | 2.4819790  | 0.7323239  | 7.3198374  |
| C  | 1.8578569  | -0.1573413 | -7.4570476 |
| H  | 2.4218005  | -1.0461991 | -7.1536208 |
| H  | 1.5919066  | -0.2463462 | -8.5085235 |

|   |           |           |            |
|---|-----------|-----------|------------|
| H | 2.4819790 | 0.7323239 | -7.3198374 |
|---|-----------|-----------|------------|

**2'**

|    |            |            |            |
|----|------------|------------|------------|
| Zn | 1.5701321  | 0.1644807  | 0.0000000  |
| O  | -0.1156304 | 0.2947378  | 1.2772997  |
| O  | 2.1976347  | 0.0877003  | 2.4862408  |
| C  | -2.6158903 | 0.3121233  | 2.7646022  |
| H  | -3.4277794 | 0.2855300  | 3.4994215  |
| N  | -2.9571280 | 0.4599431  | 1.5283636  |
| N  | -2.9571280 | 0.4599431  | -1.5283636 |
| C  | -0.1256836 | 0.1904047  | 2.5792802  |
| C  | -0.0626032 | -0.0574678 | 5.3878577  |
| H  | -0.0200537 | -0.1540009 | 6.4650090  |
| C  | -1.2612364 | 0.0570588  | 4.7435136  |
| H  | -2.1901798 | 0.0549882  | 5.3031608  |
| C  | 1.1074345  | 0.0712393  | 3.2746299  |
| C  | -1.3158083 | 0.1850415  | 3.3369973  |
| C  | -1.2612364 | 0.0570588  | -4.7435136 |
| H  | -2.1901798 | 0.0549882  | -5.3031608 |
| C  | 1.1074345  | 0.0712393  | -3.2746299 |
| C  | 1.1263629  | -0.0499788 | -4.6475580 |
| H  | 2.0712464  | -0.1410946 | -5.1662905 |
| O  | 2.1976347  | 0.0877003  | -2.4862408 |

|   |            |            |            |
|---|------------|------------|------------|
| O | -0.1156304 | 0.2947378  | -1.2772997 |
| C | 1.1263629  | -0.0499788 | 4.6475580  |
| H | 2.0712464  | -0.1410946 | 5.1662905  |
| C | 4.5201850  | -0.0714306 | 2.0018251  |
| H | 5.5093124  | -0.1951238 | 2.4457410  |
| H | 4.3515577  | -0.8905649 | 1.3023437  |
| H | 4.5028616  | 0.8711588  | 1.4544777  |
| C | -1.3158083 | 0.1850415  | -3.3369973 |
| C | -2.6158903 | 0.3121233  | -2.7646022 |
| H | -3.4277794 | 0.2855300  | -3.4994215 |
| C | 3.4789327  | -0.0796666 | 3.0874320  |
| H | 3.4914742  | -1.0284382 | 3.6363875  |
| H | 3.6463391  | 0.7369736  | 3.7990944  |
| C | -4.3785626 | 0.6241893  | 1.2629315  |
| H | -4.5912468 | 1.6963722  | 1.1685988  |
| H | -4.9525981 | 0.2588463  | 2.1232822  |
| C | -0.1256836 | 0.1904047  | -2.5792802 |
| C | 4.5201850  | -0.0714306 | -2.0018251 |
| H | 5.5093124  | -0.1951238 | -2.4457410 |
| H | 4.5028616  | 0.8711588  | -1.4544777 |
| H | 4.3515577  | -0.8905649 | -1.3023437 |
| C | -0.0626032 | -0.0574678 | -5.3878577 |
| H | -0.0200537 | -0.1540009 | -6.4650090 |
| C | 3.4789327  | -0.0796666 | -3.0874320 |
| H | 3.6463391  | 0.7369736  | -3.7990944 |
| H | 3.4914742  | -1.0284382 | -3.6363875 |

|    |            |            |            |
|----|------------|------------|------------|
| C  | -4.3785626 | 0.6241893  | -1.2629315 |
| H  | -4.9525981 | 0.2588463  | -2.1232822 |
| H  | -4.5912468 | 1.6963722  | -1.1685988 |
| C  | -4.8886275 | -0.0776899 | 0.0000000  |
| C  | -6.4095003 | 0.0713584  | 0.0000000  |
| H  | -6.8457860 | -0.4028675 | 0.8818707  |
| H  | -6.7088492 | 1.1234192  | 0.0000000  |
| H  | -6.8457860 | -0.4028675 | -0.8818707 |
| C  | -4.5186701 | -1.5554045 | 0.0000000  |
| H  | -4.9242923 | -2.0532683 | 0.8839513  |
| H  | -4.9242923 | -2.0532683 | -0.8839513 |
| H  | -3.4386122 | -1.7180505 | 0.0000000  |
| Zn | -1.6325694 | 0.4183420  | 0.0000000  |
| N  | 2.3886112  | -4.0929738 | 0.0000000  |
| C  | 3.5300443  | -4.7429458 | 0.0000000  |
| C  | 2.2636933  | -2.8390698 | 0.0000000  |
| N  | 4.4910307  | -5.3915668 | 0.0000000  |
| N  | 2.0350789  | -1.6903168 | 0.0000000  |
| N  | 3.3302269  | 4.1274149  | 0.0000000  |
| C  | 4.6077142  | 4.4355604  | 0.0000000  |
| C  | 2.8759759  | 2.9513223  | 0.0000000  |
| N  | 5.7122387  | 4.7881165  | 0.0000000  |
| N  | 2.3543575  | 1.9031929  | 0.0000000  |

2'a

|    |            |           |            |
|----|------------|-----------|------------|
| Zn | 2.0944496  | 0.2195387 | 0.0000000  |
| O  | 0.5013672  | 0.4419432 | 1.2726539  |
| C  | -1.9972196 | 0.3697904 | 2.7706152  |
| H  | -2.8074443 | 0.3115692 | 3.5053350  |
| N  | -2.3420667 | 0.5087732 | 1.5347986  |
| N  | -2.3420667 | 0.5087732 | -1.5347986 |
| C  | 0.5093291  | 0.3344641 | 2.5865156  |
| C  | 0.5738541  | 0.0820113 | 5.4063262  |
| C  | -0.6280383 | 0.1600466 | 4.7372405  |
| H  | -1.5450438 | 0.1227137 | 5.3153861  |
| C  | 1.7163163  | 0.2578675 | 3.2835228  |
| C  | -0.6886821 | 0.2882251 | 3.3388916  |
| C  | -0.6280383 | 0.1600466 | -4.7372405 |
| H  | -1.5450438 | 0.1227137 | -5.3153861 |
| C  | 1.7163163  | 0.2578675 | -3.2835228 |
| C  | 1.7557618  | 0.1345442 | -4.6569250 |
| H  | 2.7205948  | 0.0789149 | -5.1436768 |
| O  | 0.5013672  | 0.4419432 | -1.2726539 |
| C  | 1.7557618  | 0.1345442 | 4.6569250  |
| H  | 2.7205948  | 0.0789149 | 5.1436768  |
| C  | -0.6886821 | 0.2882251 | -3.3388916 |
| C  | -1.9972196 | 0.3697904 | -2.7706152 |
| H  | -2.8074443 | 0.3115692 | -3.5053350 |
| C  | -3.7679315 | 0.6217456 | 1.2648157  |
| H  | -4.0174633 | 1.6858590 | 1.1699094  |



|    |            |            |            |
|----|------------|------------|------------|
| H  | -4.3312122 | 0.2362494  | 2.1233226  |
| C  | 0.5093291  | 0.3344641  | -2.5865156 |
| C  | 0.5738541  | 0.0820113  | -5.4063262 |
| C  | -3.7679315 | 0.6217456  | -1.2648157 |
| H  | -4.3312122 | 0.2362494  | -2.1233226 |
| H  | -4.0174633 | 1.6858590  | -1.1699094 |
| C  | -4.2496387 | -0.0980660 | 0.0000000  |
| C  | -5.7751910 | -0.0054935 | 0.0000000  |
| H  | -6.1935945 | -0.4955168 | 0.8818295  |
| H  | -6.1135478 | 1.0347586  | 0.0000000  |
| H  | -6.1935945 | -0.4955168 | -0.8818295 |
| C  | -3.8250341 | -1.5609860 | 0.0000000  |
| H  | -4.2118479 | -2.0736276 | 0.8839163  |
| H  | -4.2118479 | -2.0736276 | -0.8839163 |
| H  | -2.7396533 | -1.6844359 | 0.0000000  |
| Zn | -1.0233863 | 0.5173807  | 0.0000000  |
| N  | 2.9263113  | -4.0059290 | 0.0000000  |
| C  | 4.0270025  | -4.7214951 | 0.0000000  |
| C  | 2.8323670  | -2.7543153 | 0.0000000  |
| N  | 4.9409687  | -5.4339307 | 0.0000000  |
| N  | 2.6132962  | -1.6015731 | 0.0000000  |
| N  | 4.4181895  | 3.8447744  | 0.0000000  |
| C  | 5.7081559  | 4.0889478  | 0.0000000  |
| C  | 3.8549768  | 2.7241145  | 0.0000000  |
| N  | 6.8243593  | 4.4002681  | 0.0000000  |
| N  | 3.2131830  | 1.7411729  | 0.0000000  |

|   |           |            |            |
|---|-----------|------------|------------|
| H | 2.6438894 | 0.3013719  | -2.7233841 |
| H | 2.6438894 | 0.3013719  | 2.7233841  |
| O | 0.5192354 | -0.0374684 | -6.7513878 |
| O | 0.5192354 | -0.0374684 | 6.7513878  |
| C | 1.7371744 | -0.1489451 | 7.4685879  |
| H | 2.2974111 | -1.0238514 | 7.1145332  |
| H | 2.3539855 | 0.7418870  | 7.2948045  |
| C | 1.7371744 | -0.1489451 | -7.4685879 |
| H | 2.2974111 | -1.0238514 | -7.1145332 |
| H | 2.3539855 | 0.7418870  | -7.2948045 |
| C | 1.3967322 | -0.2865523 | 8.9288957  |
| H | 2.3114581 | -0.3764131 | 9.5176183  |
| H | 0.8439175 | 0.5867081  | 9.2790934  |
| H | 0.7861129 | -1.1746753 | 9.0995334  |
| C | 1.3967322 | -0.2865523 | -8.9288957 |
| H | 0.8439175 | 0.5867081  | -9.2790934 |
| H | 2.3114581 | -0.3764131 | -9.5176183 |
| H | 0.7861129 | -1.1746753 | -9.0995334 |

**ZnL<sup>1</sup>**

|   |            |           |           |
|---|------------|-----------|-----------|
| O | 1.1489382  | 0.3025799 | 1.3459645 |
| O | 3.4446612  | 0.1082809 | 2.5747208 |
| C | -1.3703506 | 0.2538569 | 2.7662561 |
| H | -2.2040275 | 0.2173428 | 3.4784280 |

|   |            |            |            |
|---|------------|------------|------------|
| N | -1.6804722 | 0.4280215  | 1.5202839  |
| N | -1.6804722 | 0.4280215  | -1.5202839 |
| C | 1.1065265  | 0.1648897  | 2.6123206  |
| C | 1.1290404  | -0.1619719 | 5.4348810  |
| H | 1.1588121  | -0.2874346 | 6.5099356  |
| C | -0.0585202 | -0.0519705 | 4.7760212  |
| H | -0.9971285 | -0.0853850 | 5.3203228  |
| C | 2.3400371  | 0.0491313  | 3.3442984  |
| C | -0.0943912 | 0.1150854  | 3.3696715  |
| C | -0.0585202 | -0.0519705 | -4.7760212 |
| H | -0.9971285 | -0.0853850 | -5.3203228 |
| C | 2.3400371  | 0.0491313  | -3.3442984 |
| C | 2.3354757  | -0.1094113 | -4.7085099 |
| H | 3.2718214  | -0.1971955 | -5.2450633 |
| O | 3.4446612  | 0.1082809  | -2.5747208 |
| O | 1.1489382  | 0.3025799  | -1.3459645 |
| C | 2.3354757  | -0.1094113 | 4.7085099  |
| H | 3.2718214  | -0.1971955 | 5.2450633  |
| C | -0.0943912 | 0.1150854  | -3.3696715 |
| C | -1.3703506 | 0.2538569  | -2.7662561 |
| H | -2.2040275 | 0.2173428  | -3.4784280 |
| C | 4.6894696  | 0.0032029  | 3.2114088  |
| H | 4.7998321  | -0.9571417 | 3.7300682  |
| H | 4.8463194  | 0.8152238  | 3.9319536  |
| C | -3.0954448 | 0.6191731  | 1.2562929  |
| H | -3.2924846 | 1.6947799  | 1.1550327  |

|    |            |            |            |
|----|------------|------------|------------|
| H  | -3.6792151 | 0.2713476  | 2.1192861  |
| C  | 1.1065265  | 0.1648897  | -2.6123206 |
| C  | 1.1290404  | -0.1619719 | -5.4348810 |
| H  | 1.1588121  | -0.2874346 | -6.5099356 |
| C  | 4.6894696  | 0.0032029  | -3.2114088 |
| H  | 4.8463194  | 0.8152238  | -3.9319536 |
| H  | 4.7998321  | -0.9571417 | -3.7300682 |
| C  | -3.0954448 | 0.6191731  | -1.2562929 |
| H  | -3.6792151 | 0.2713476  | -2.1192861 |
| H  | -3.2924846 | 1.6947799  | -1.1550327 |
| C  | -3.6239743 | -0.0746696 | 0.0000000  |
| C  | -5.1413667 | 0.1005996  | 0.0000000  |
| H  | -5.5866287 | -0.3646901 | 0.8826466  |
| H  | -5.4205789 | 1.1584877  | 0.0000000  |
| H  | -5.5866287 | -0.3646901 | -0.8826466 |
| C  | -3.2776315 | -1.5573439 | 0.0000000  |
| H  | -3.6901085 | -2.0488621 | 0.8849154  |
| H  | -3.6901085 | -2.0488621 | -0.8849154 |
| H  | -2.1992671 | -1.7255263 | 0.0000000  |
| Zn | -0.2613013 | 0.3947467  | 0.0000000  |
| H  | 5.4398984  | 0.0730001  | -2.4254328 |
| H  | 5.4398984  | 0.0730001  | 2.4254328  |

**ZnL<sup>2</sup>**

|   |            |            |            |
|---|------------|------------|------------|
| O | 0.5130190  | 0.3031873  | 1.3419725  |
| O | 2.8084551  | 0.0939210  | 2.5566664  |
| C | -2.0027522 | 0.2525113  | 2.7671624  |
| H | -2.8354818 | 0.2153067  | 3.4804452  |
| N | -2.3145856 | 0.4280987  | 1.5215518  |
| N | -2.3145856 | 0.4280987  | -1.5215518 |
| C | 0.4734217  | 0.1607949  | 2.6077722  |
| C | 0.5053736  | -0.1756573 | 5.4272787  |
| H | 0.5385176  | -0.3045716 | 6.5018601  |
| C | -0.6846794 | -0.0598020 | 4.7737118  |
| H | -1.6211023 | -0.0923865 | 5.3218283  |
| C | 1.7099772  | 0.0375544  | 3.3334038  |
| C | -0.7256325 | 0.1116955  | 3.3678794  |
| C | -0.6846794 | -0.0598020 | -4.7737118 |
| H | -1.6211023 | -0.0923865 | -5.3218283 |
| C | 1.7099772  | 0.0375544  | -3.3334038 |
| C | 1.7100623  | -0.1254244 | -4.6972647 |
| H | 2.6479605  | -0.2185818 | -5.2301844 |
| O | 2.8084551  | 0.0939210  | -2.5566664 |
| O | 0.5130190  | 0.3031873  | -1.3419725 |
| C | 1.7100623  | -0.1254244 | 4.6972647  |
| H | 2.6479605  | -0.2185818 | 5.2301844  |
| C | 5.1128917  | 0.0568646  | 2.0851842  |
| H | 6.1134207  | -0.0304311 | 2.5141422  |
| H | 4.9706131  | -0.7454020 | 1.3595619  |

|   |            |            |            |
|---|------------|------------|------------|
| H | 5.0391204  | 1.0089670  | 1.5572060  |
| C | -0.7256325 | 0.1116955  | -3.3678794 |
| C | -2.0027522 | 0.2525113  | -2.7671624 |
| H | -2.8354818 | 0.2153067  | -3.4804452 |
| C | 4.0707014  | -0.0260584 | 3.1708130  |
| H | 4.1389443  | -0.9835982 | 3.7057719  |
| H | 4.2082925  | 0.7770995  | 3.9080989  |
| C | -3.7294168 | 0.6187679  | 1.2571566  |
| H | -3.9270603 | 1.6942966  | 1.1562114  |
| H | -4.3135417 | 0.2701548  | 2.1196252  |
| C | 0.4734217  | 0.1607949  | -2.6077722 |
| C | 5.1128917  | 0.0568646  | -2.0851842 |
| H | 6.1134207  | -0.0304311 | -2.5141422 |
| H | 5.0391204  | 1.0089670  | -1.5572060 |
| H | 4.9706131  | -0.7454020 | -1.3595619 |
| C | 0.5053736  | -0.1756573 | -5.4272787 |
| H | 0.5385176  | -0.3045716 | -6.5018601 |
| C | 4.0707014  | -0.0260584 | -3.1708130 |
| H | 4.2082925  | 0.7770995  | -3.9080989 |
| H | 4.1389443  | -0.9835982 | -3.7057719 |
| C | -3.7294168 | 0.6187679  | -1.2571566 |
| H | -4.3135417 | 0.2701548  | -2.1196252 |
| H | -3.9270603 | 1.6942966  | -1.1562114 |
| C | -4.2572454 | -0.0749476 | 0.0000000  |
| C | -5.7747573 | 0.0995315  | 0.0000000  |
| H | -6.2197721 | -0.3659490 | 0.8826632  |

|    |            |            |            |
|----|------------|------------|------------|
| H  | -6.0545070 | 1.1572837  | 0.0000000  |
| H  | -6.2197721 | -0.3659490 | -0.8826632 |
| C  | -3.9103271 | -1.5575079 | 0.0000000  |
| H  | -4.3225680 | -2.0491303 | 0.8849663  |
| H  | -4.3225680 | -2.0491303 | -0.8849663 |
| H  | -2.8319017 | -1.7252853 | 0.0000000  |
| Zn | -0.8996185 | 0.3964706  | 0.0000000  |

**ZnL<sup>1a</sup>**

|   |            |            |            |
|---|------------|------------|------------|
| O | 1.5430453  | 0.3371718  | 1.3403548  |
| C | -0.9886473 | 0.3212950  | 2.7717391  |
| H | -1.8219329 | 0.2958349  | 3.4848382  |
| N | -1.2957175 | 0.4718384  | 1.5232411  |
| N | -1.2957175 | 0.4718384  | -1.5232411 |
| C | 1.5015803  | 0.2211656  | 2.6178871  |
| C | 1.5153815  | -0.0509143 | 5.4551072  |
| C | 0.3293449  | 0.0561375  | 4.7744873  |
| H | -0.5979887 | 0.0386907  | 5.3383929  |
| C | 2.7038869  | 0.1084198  | 3.3544060  |
| C | 0.2925199  | 0.1942420  | 3.3723435  |
| C | 0.3293449  | 0.0561375  | -4.7744873 |
| H | -0.5979887 | 0.0386907  | -5.3383929 |
| C | 2.7038869  | 0.1084198  | -3.3544060 |
| C | 2.7142896  | -0.0229190 | -4.7220473 |

|    |            |            |            |
|----|------------|------------|------------|
| H  | 3.6675684  | -0.1050539 | -5.2298143 |
| O  | 1.5430453  | 0.3371718  | -1.3403548 |
| C  | 2.7142896  | -0.0229190 | 4.7220473  |
| H  | 3.6675684  | -0.1050539 | 5.2298143  |
| C  | 0.2925199  | 0.1942420  | -3.3723435 |
| C  | -0.9886473 | 0.3212950  | -2.7717391 |
| H  | -1.8219329 | 0.2958349  | -3.4848382 |
| C  | -2.7120001 | 0.6512866  | 1.2557677  |
| H  | -2.9162579 | 1.7252225  | 1.1517995  |
| H  | -3.2948014 | 0.3011224  | 2.1183217  |
| C  | 1.5015803  | 0.2211656  | -2.6178871 |
| C  | 1.5153815  | -0.0509143 | -5.4551072 |
| C  | -2.7120001 | 0.6512866  | -1.2557677 |
| H  | -3.2948014 | 0.3011224  | -2.1183217 |
| H  | -2.9162579 | 1.7252225  | -1.1517995 |
| C  | -3.2324911 | -0.0488535 | 0.0000000  |
| C  | -4.7518062 | 0.1099964  | 0.0000000  |
| H  | -5.1919377 | -0.3601239 | 0.8826238  |
| H  | -5.0425608 | 1.1647713  | 0.0000000  |
| H  | -5.1919377 | -0.3601239 | -0.8826238 |
| C  | -2.8706330 | -1.5278646 | 0.0000000  |
| H  | -3.2780583 | -2.0235909 | 0.8848800  |
| H  | -3.2780583 | -2.0235909 | -0.8848800 |
| H  | -1.7906395 | -1.6853886 | 0.0000000  |
| Zn | 0.1361173  | 0.4301680  | 0.0000000  |
| H  | 3.6304529  | 0.1278730  | -2.7932558 |



|   |           |            |            |
|---|-----------|------------|------------|
| H | 3.6304529 | 0.1278730  | 2.7932558  |
| O | 1.4454401 | -0.1737325 | -6.8116467 |
| O | 1.4454401 | -0.1737325 | 6.8116467  |
| C | 2.6499716 | -0.3062406 | 7.5193295  |
| H | 3.2051374 | -1.2024226 | 7.2163758  |
| H | 3.2962308 | 0.5709786  | 7.3947928  |
| C | 2.6499716 | -0.3062406 | -7.5193295 |
| H | 3.2051374 | -1.2024226 | -7.2163758 |
| H | 3.2962308 | 0.5709786  | -7.3947928 |
| H | 2.3784988 | -0.3976954 | 8.5702260  |
| H | 2.3784988 | -0.3976954 | -8.5702260 |

**ZnL<sup>2a</sup>**

|   |            |           |            |
|---|------------|-----------|------------|
| O | 1.3176951  | 0.3298392 | 1.3399860  |
| C | -1.2124161 | 0.3596538 | 2.7736048  |
| H | -2.0454739 | 0.3474597 | 3.4873487  |
| N | -1.5195051 | 0.4969776 | 1.5234707  |
| N | -1.5195051 | 0.4969776 | -1.5234707 |
| C | 1.2763343  | 0.2348882 | 2.6193459  |
| C | 1.2904085  | 0.0098863 | 5.4617877  |
| C | 0.1052153  | 0.1170273 | 4.7795340  |
| H | -0.8218283 | 0.1180007 | 5.3442257  |
| C | 2.4780148  | 0.1209791 | 3.3566921  |
| C | 0.0680018  | 0.2323279 | 3.3752078  |

|   |            |            |            |
|---|------------|------------|------------|
| C | 0.1052153  | 0.1170273  | -4.7795340 |
| H | -0.8218283 | 0.1180007  | -5.3442257 |
| C | 2.4780148  | 0.1209791  | -3.3566921 |
| C | 2.4888398  | 0.0127179  | -4.7262939 |
| H | 3.4419005  | -0.0709494 | -5.2339850 |
| O | 1.3176951  | 0.3298392  | -1.3399860 |
| C | 2.4888398  | 0.0127179  | 4.7262939  |
| H | 3.4419005  | -0.0709494 | 5.2339850  |
| C | 0.0680018  | 0.2323279  | -3.3752078 |
| C | -1.2124161 | 0.3596538  | -2.7736048 |
| H | -2.0454739 | 0.3474597  | -3.4873487 |
| C | -2.9354681 | 0.6790605  | 1.2555697  |
| H | -3.1380901 | 1.7532886  | 1.1511018  |
| H | -3.5190473 | 0.3302022  | 2.1181019  |
| C | 1.2763343  | 0.2348882  | -2.6193459 |
| C | 1.2904085  | 0.0098863  | -5.4617877 |
| C | -2.9354681 | 0.6790605  | -1.2555697 |
| H | -3.5190473 | 0.3302022  | -2.1181019 |
| H | -3.1380901 | 1.7532886  | -1.1511018 |
| C | -3.4570252 | -0.0205067 | 0.0000000  |
| C | -4.9761006 | 0.1406951  | 0.0000000  |
| H | -5.4169611 | -0.3287578 | 0.8826278  |
| H | -5.2652392 | 1.1959131  | 0.0000000  |
| H | -5.4169611 | -0.3287578 | -0.8826278 |
| C | -3.0979563 | -1.5002136 | 0.0000000  |
| H | -3.5063656 | -1.9951289 | 0.8848783  |

|    |            |            |            |
|----|------------|------------|------------|
| H  | -3.5063656 | -1.9951289 | -0.8848783 |
| H  | -2.0183641 | -1.6601873 | 0.0000000  |
| Zn | -0.0885404 | 0.4380972  | 0.0000000  |
| H  | 3.4042026  | 0.1210752  | -2.7944951 |
| H  | 3.4042026  | 0.1210752  | 2.7944951  |
| O  | 1.2200217  | -0.0878215 | -6.8195705 |
| O  | 1.2200217  | -0.0878215 | 6.8195705  |
| C  | 2.4227944  | -0.2260242 | 7.5424365  |
| H  | 2.9603548  | -1.1263101 | 7.2138823  |
| H  | 3.0765917  | 0.6376092  | 7.3596071  |
| C  | 2.4227944  | -0.2260242 | -7.5424365 |
| H  | 2.9603548  | -1.1263101 | -7.2138823 |
| H  | 3.0765917  | 0.6376092  | -7.3596071 |
| C  | 2.0701737  | -0.3224919 | 9.0046564  |
| H  | 2.9760863  | -0.4340550 | 9.6039430  |
| H  | 1.5457503  | 0.5768089  | 9.3326081  |
| H  | 1.4243828  | -1.1831623 | 9.1874217  |
| C  | 2.0701737  | -0.3224919 | -9.0046564 |
| H  | 1.5457503  | 0.5768089  | -9.3326081 |
| H  | 2.9760863  | -0.4340550 | -9.6039430 |
| H  | 1.4243828  | -1.1831623 | -9.1874217 |

## Reference

- 1 A. Sarkar, A. Chakraborty, T. Chakraborty, S. Purkait, D. Samanta, S. Maity and D. Das, *Inorg. Chem.*, 2020, **59**(13), 9014–9028.
- 2 M. Karmakar, A. Frontera and S. Chattopadhyay, *CrystEngComm*, 2020, **22**, 6876–6885.
- 3 T. Basak, M.G.B. Drew and S. Chattopadhyay, *Inorg. Chem. Commun.*, 2018, **98**, 92–98
- 4 T. Basak, A. Bhattacharyya, K. Harms and S. Chattopadhyay, *Polyhedron*, 2019, **157**, 449–457.
- 5 T. Basak, A. Bhattacharyya, M. Das, K. Harms and A. Bauza, *ChemistrySelect*, 2017, **2**, 6286–6295.
- 6 T.K. Ghosh, S. Jana and A. Ghosh, *Inorg. Chem.*, 2018, **57**, 15216–15228.
- 7 M. Karmakar, T. Basak and S. Chattopadhyay, *New J. Chem.*, 2019, **43**, 4432–4443.
- 8 M. A. Spackman and D. Jayatilaka, *CrystEngComm*, 2009, **11**, 19–32.
- 9 F.L. Hirshfeld, *Theor. Chim. Acta*, 1977, **44**, 129–138.

10 H. F. Clausen, M. S. Chevallier, M. A. Spackman and B. B. Iversen, *New J. Chem.*, 2010, **34**, 193-199.

11 S. K. Wolff, D. J. Grimwood, J. J. McKinnon, D. Jayatilaka and M.A. Spackman, *Crystal Explorer 2.1*, University of Western Australia, 2005-2007, [http://hirshfeldsurfacenet/CrystalExplorer/crystal\\_explorer@theochem.uwa.edu.au](http://hirshfeldsurfacenet/CrystalExplorer/crystal_explorer@theochem.uwa.edu.au).

12 A.L. Rohl, M. Moret, W. Kaminsky, K. Claborn, J.J. McKinnon and B. Kahr, *Cryst. Growth Des.* 2008, **8**, 4517-4525.

13 A. Parkin, G. Barr, W. Dong, C.J. Gilmore, D. Jayatilaka, J.J. McKinnon, M.A. Spackman and C.C. Wilson, *CrystEngComm*, 2007, **9**, 648-652.

14 M.A. Spackman and J.J. McKinnon, *CrystEngComm*, 2002, **4**, 378-392.
